# Supplementary material for: Effects of Different Feeding Methods on the Structure, Metabolism, and Gas Production of Infant and Toddler Intestinal Flora and Their Mechanisms
Source: MDPI journal article supplement (doi:10.3390/nu14081568), 2022-04-09
Supplement: s1 [file s1]

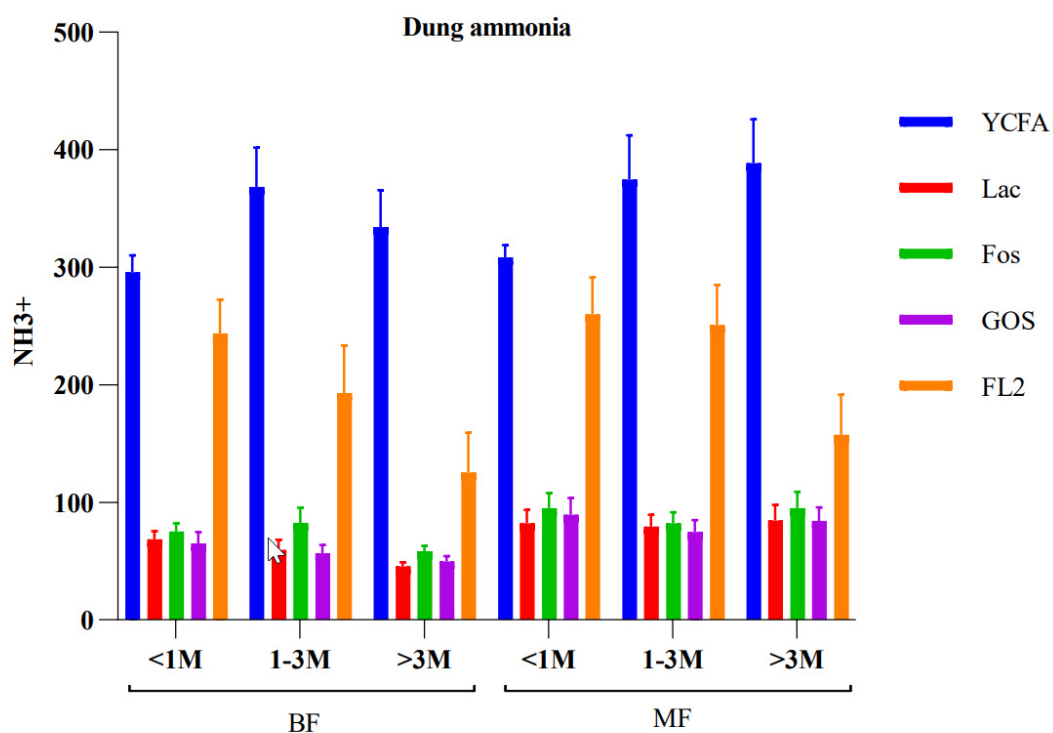

**Figure S1. Comparison of *in vitro* simulated fermented fecal ammonia levels in infants and toddlers fed differently and at different growth stages**

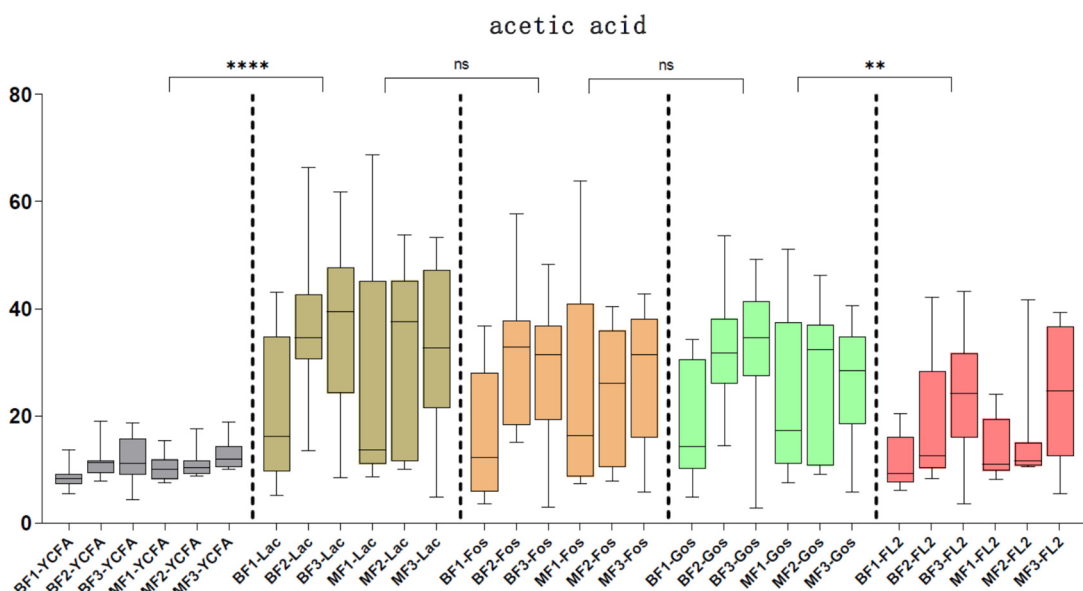

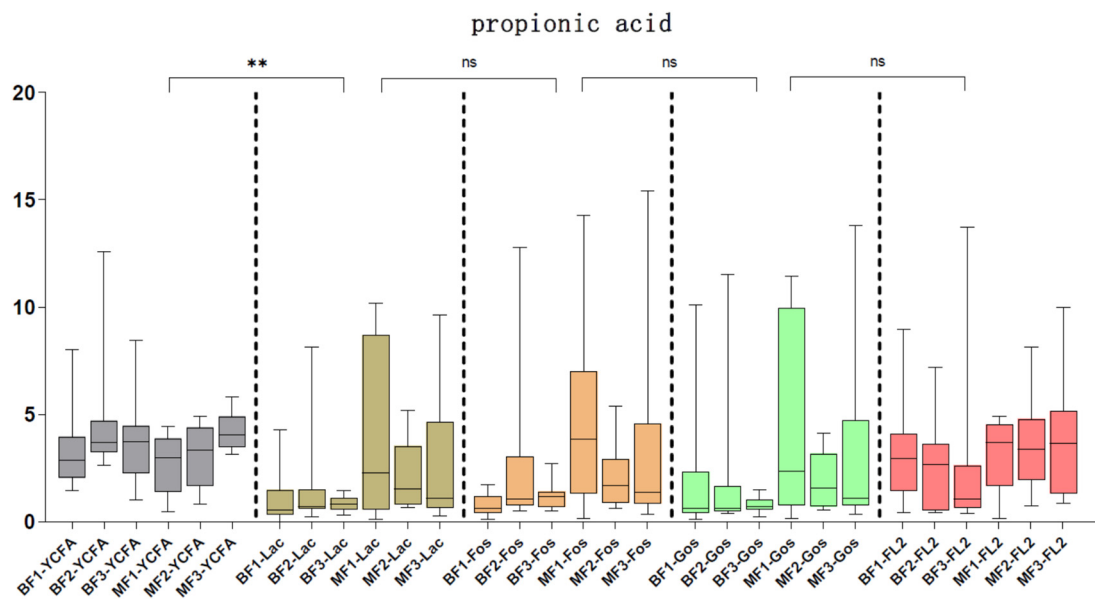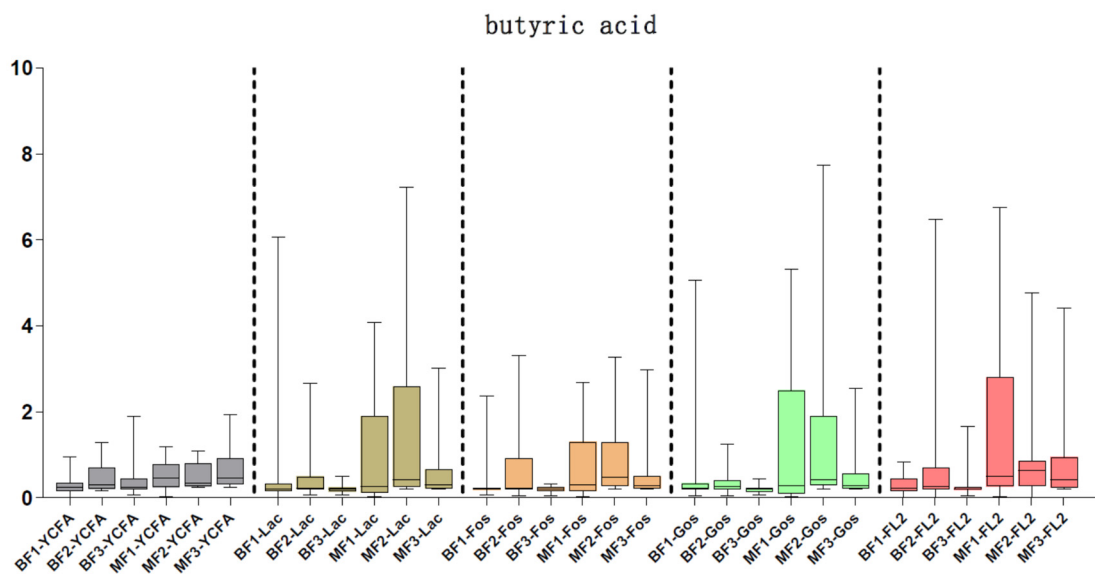

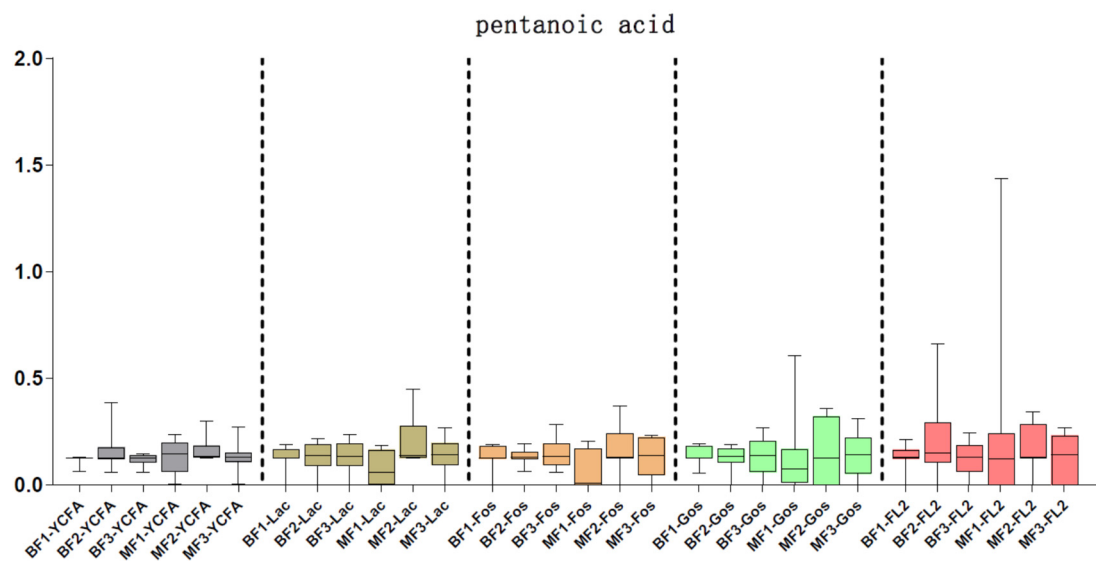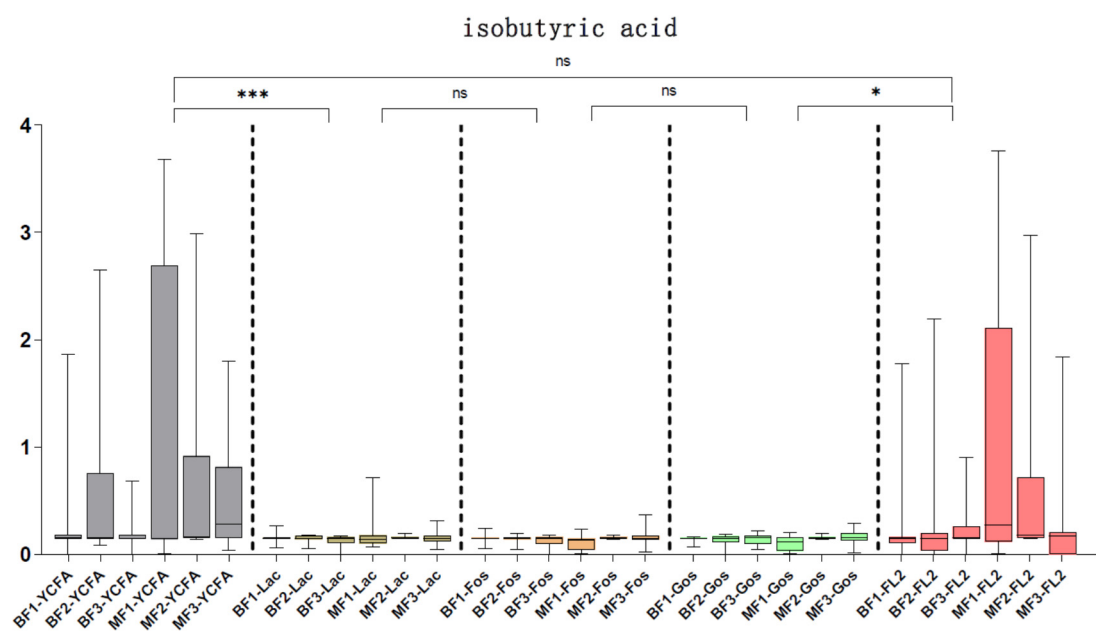

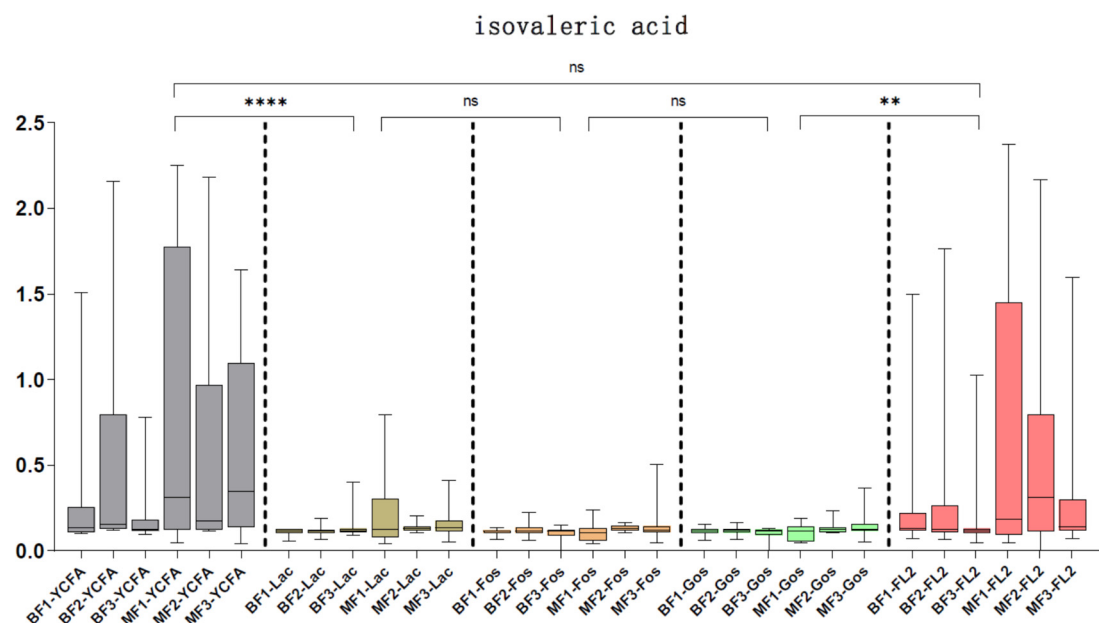

**Figure S2. Comparison of *in vitro* simulated fermentation of SCFA production by fecal bacteria from infants and toddlers fed differently and at different growth stages**

Data were expressed as the mean  $\pm$  SEM. Differences are considered significant at  $P < 0.05$  (\*),  $P < 0.01$  (\*\*),  $P < 0.001$  (\*\*\*) and  $P < 0.0001$  (\*\*\*\*)

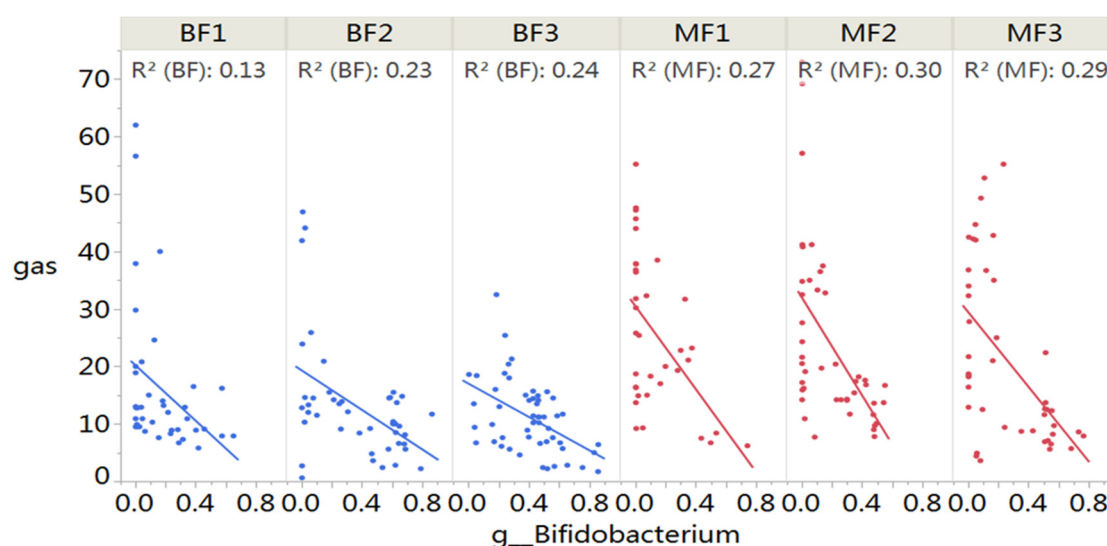

**Figure S3 Correlation analysis between *in vitro* fermentation gas production and abundance of *Bifidobacterium* spp. in infants and toddlers fed differently and at different growth stages**

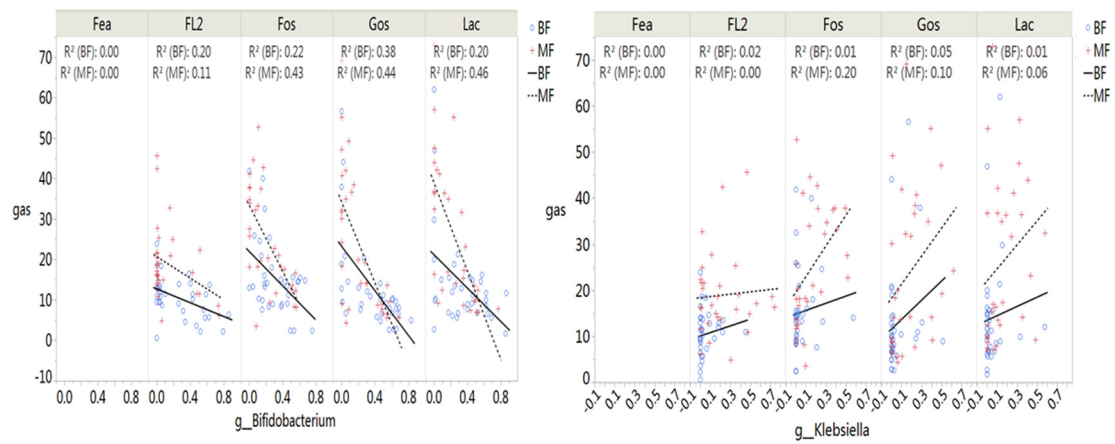

**Figure S4 Correlation analysis between fermentation gas production and abundance of *Bifidobacterium* and *Klebsiella* in fecal bacteria and carbon sources in media from different feeding methods**

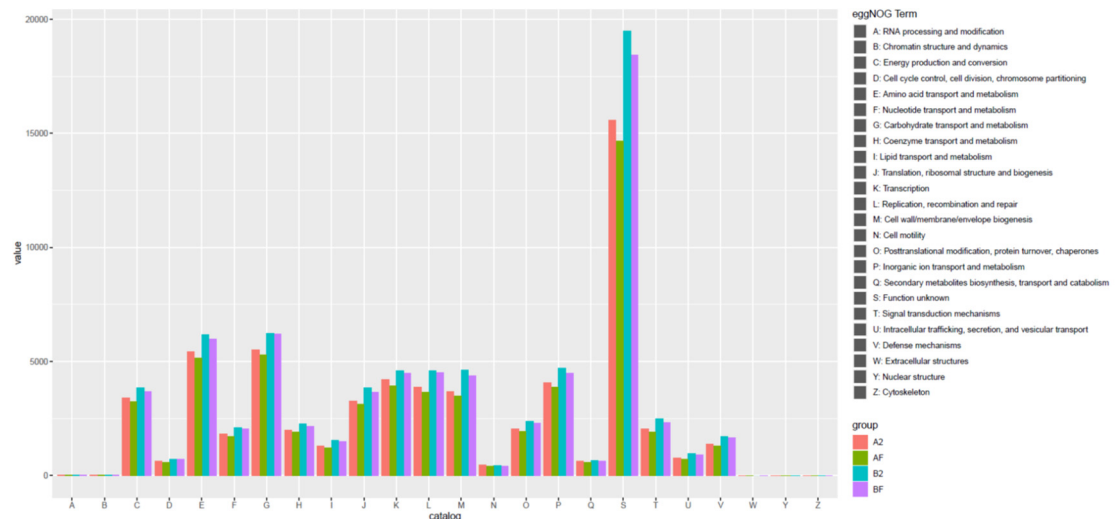

**Figure S5. Analysis of differences in functional gene enrichment in fecal bacteria from different feeding methods grown on media with different carbon sources (2'-FL and FOS). A2 represent the fermentation of intestinal flora from MF in the medium containing the carbon source of 2'-FL; AF represent the fermentation of intestinal flora from MF in the medium containing the carbon source of FOS; B2 represent the fermentation of intestinal flora from BF in the medium containing the carbon source of 2'-FL; BF represent the fermentation of intestinal flora from BF in the medium containing the carbon source of FOS.**

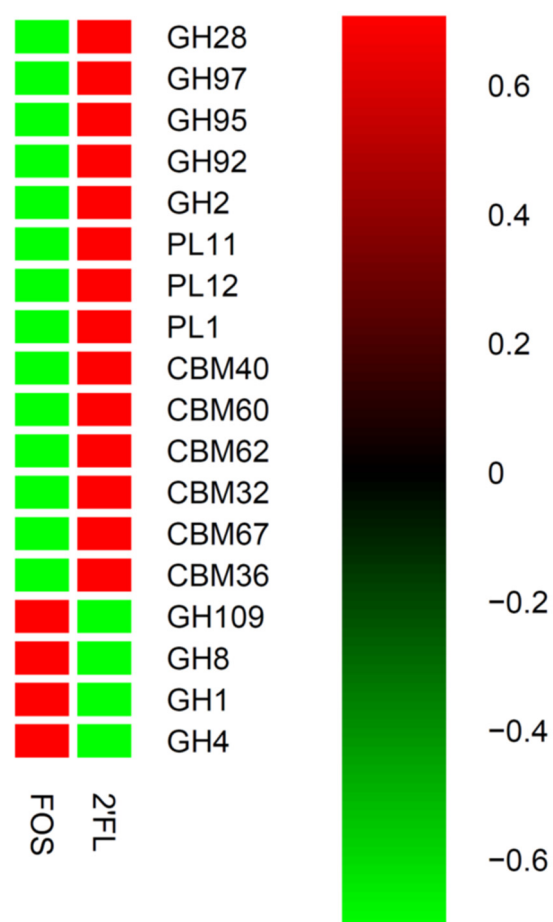

**Figure S6. The heat map of the CAZY families showing the enrichment of genes related to oligosaccharide metabolism in infant fecal bacteria cultured in medium with two different carbon sources (2'-FL and FOS).**

**Table S1. The results of transcriptome analysis**

| Group          | log2FoldChange | pvalue    | padj     | gene_name | gene_biotype         | gene_description                                                                                 |
|----------------|----------------|-----------|----------|-----------|----------------------|--------------------------------------------------------------------------------------------------|
| Kpn vs 2FL Kpn | -4.21          | 2.10E-02  | 1.00E+00 | SERF1A    | protein_coding       | small EDRK-rich factor 1A<br>[Source:HGNC<br>Symbol;Acc:HGNC:10755]                              |
| Kpn vs 2FL Kpn | -4.26          | 2.56E-02  | 1.00E+00 | MARK2P17  | processed_pseudogene | microtubule affinity regulating kinase<br>2 pseudogene 17 [Source:HGNC<br>Symbol;Acc:HGNC:50318] |
| CK vs Kpn      | 5.707077       | 0.0098251 | 1        | MARK2P17  | processed_pseudogene | microtubule affinity regulating kinase<br>2 pseudogene 17 [Source:HGNC<br>Symbol;Acc:HGNC:50318] |
| CK vs Kpn      | 4.193578       | 0.0160419 | 0.933202 | SERF1A    | protein_coding       | small EDRK-rich factor 1A<br>[Source:HGNC<br>Symbol;Acc:HGNC:10755]                              |
| Cp vs 2FL Cp   | 0.80           | 3.24E-04  | 1.00E+00 | TRIB3     | protein_coding       | tribbles pseudokinase 3<br>[Source:HGNC<br>Symbol;Acc:HGNC:16228]                                |
| Cp vs 2FL Cp   | 1.01           | 1.16E-02  | 1.00E+00 | ADM2      | protein_coding       | adrenomedullin 2 [Source:HGNC<br>Symbol;Acc:HGNC:28898]                                          |
| Cp vs 2FL Cp   | 0.48           | 1.43E-02  | 1.00E+00 | PCK2      | protein_coding       | phosphoenolpyruvate carboxykinase<br>2, mitochondrial [Source:HGNC<br>Symbol;Acc:HGNC:8725]      |
| CK vs Cp       | -2.7753        | 0.0061879 | 0.999979 | ADM2      | protein_coding       | adrenomedullin 2 [Source:HGNC<br>Symbol;Acc:HGNC:28898]                                          |

|          |          |           |          |       |                |                                                                                             |
|----------|----------|-----------|----------|-------|----------------|---------------------------------------------------------------------------------------------|
| CK vs Cp | -2.37877 | 0.0157859 | 0.999979 | TRIB3 | protein_coding | tribbles pseudokinase 3<br>[Source:HGNC<br>Symbol;Acc:HGNC:16228]                           |
| CK vs Cp | -1.50417 | 0.0346799 | 0.999979 | PCK2  | protein_coding | phosphoenolpyruvate carboxykinase<br>2, mitochondrial [Source:HGNC<br>Symbol;Acc:HGNC:8725] |
